# Supplementary material
Source: Springer Nature journal article supplement (https://www.springermedizin.de/resource/supplementary/13601_2013_634_MOESM4_ESM.pdf/9677880)
Supplement: MOESM4 [file 9677880]

**A**% change in FEV<sub>1</sub>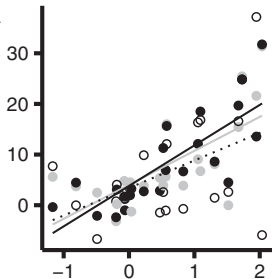weeks of ICS  
treatment

—●— 2

—●— 4

·○· 8

three-gene-mean

**B**% change in FEV<sub>1</sub>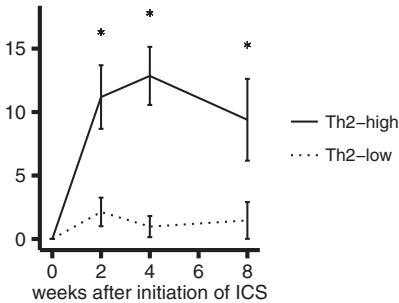

— Th2-high

····· Th2-low

weeks after initiation of ICS
